# Supplementary material
Source: publisher figshare collection journal article supplement (https://acs.figshare.com/ndownloader/files/4117504)
Supplement: Supplementary file 1 [file 4117504]

## Supporting Information

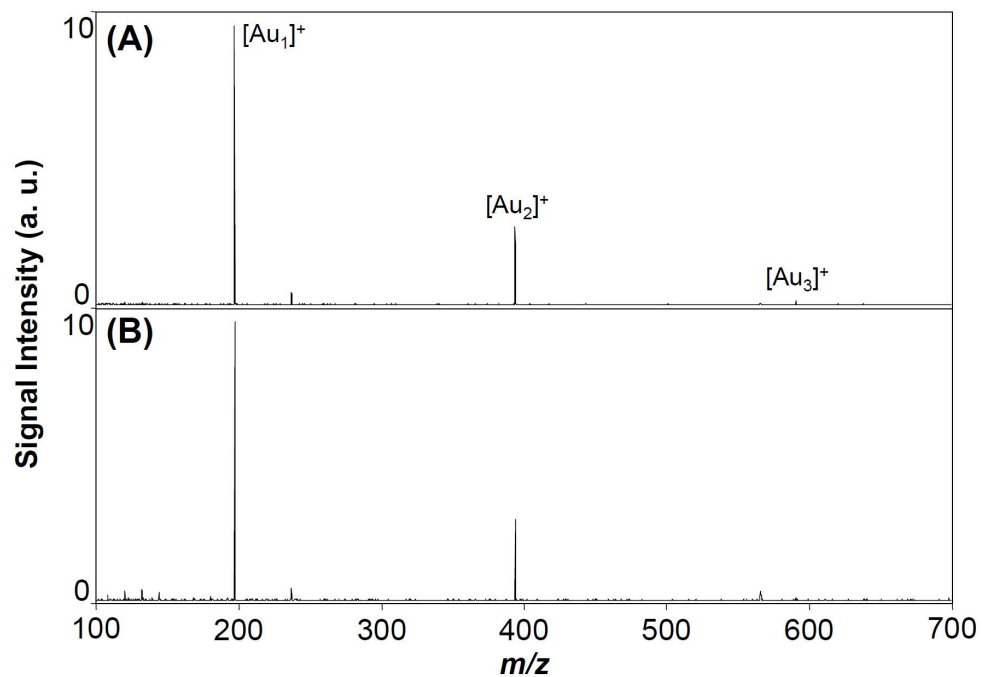

**Figure S1** Mass spectra of BSA–AuNP/NCM (10 pM) or rDNA–AuNPs/NCM (10 pM) in the (A) absence and (B) presence of thrombin (100 pM). Other conditions were the same as those described in Figure 1.

(A)

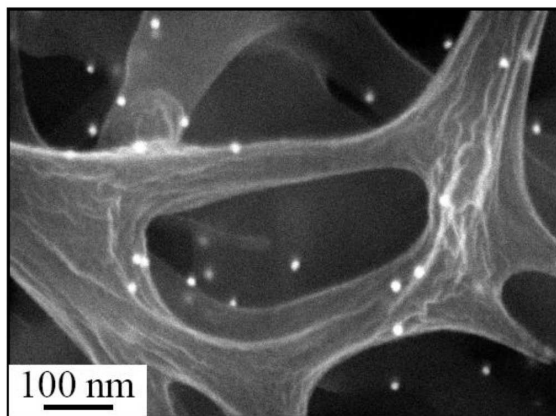

(B)

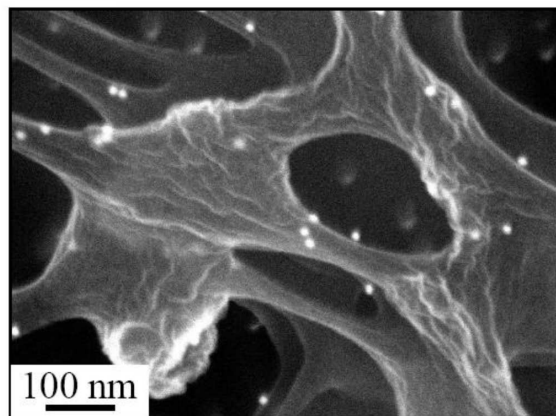

**Figure S2** SEM images of TBA<sub>29</sub>-AuNP/NCM in the (A) absence and (B) presence of thrombin (1.0 nM). Other conditions were the same as those described in Figure 1.

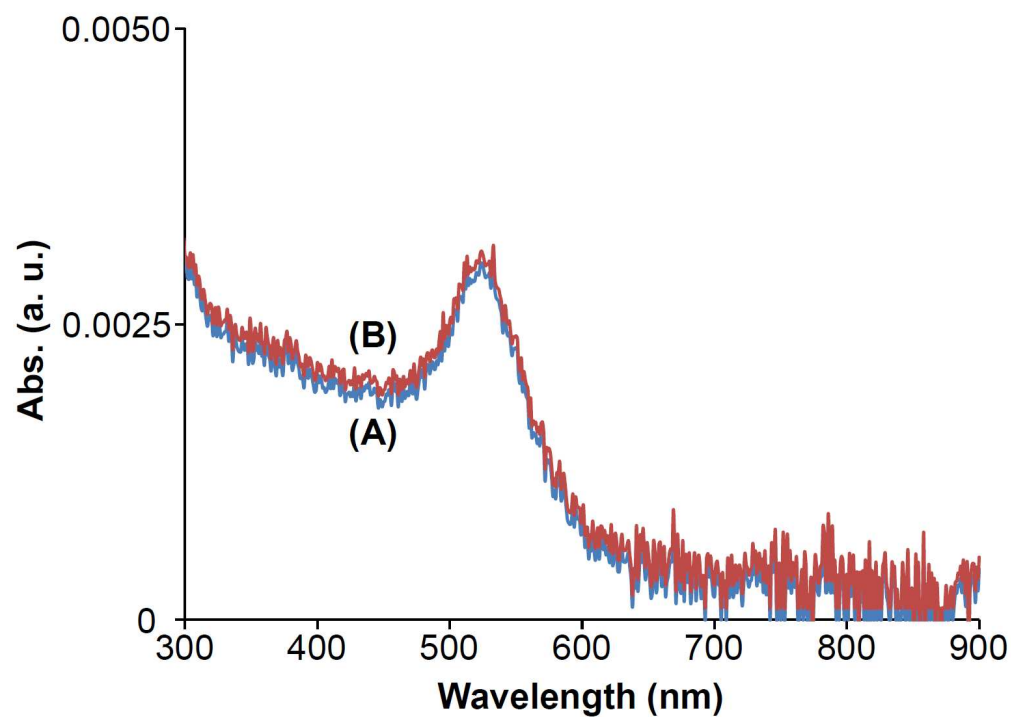

**Figure S3** UV-Vis absorption spectra of a TBA<sub>29</sub>-AuNP solution (10 pM) in the (A) absence and (B) presence of thrombin (100 pM) in a biological buffer containing BSA (100  $\mu$ M). Other conditions were the same as those described in Figure 1.

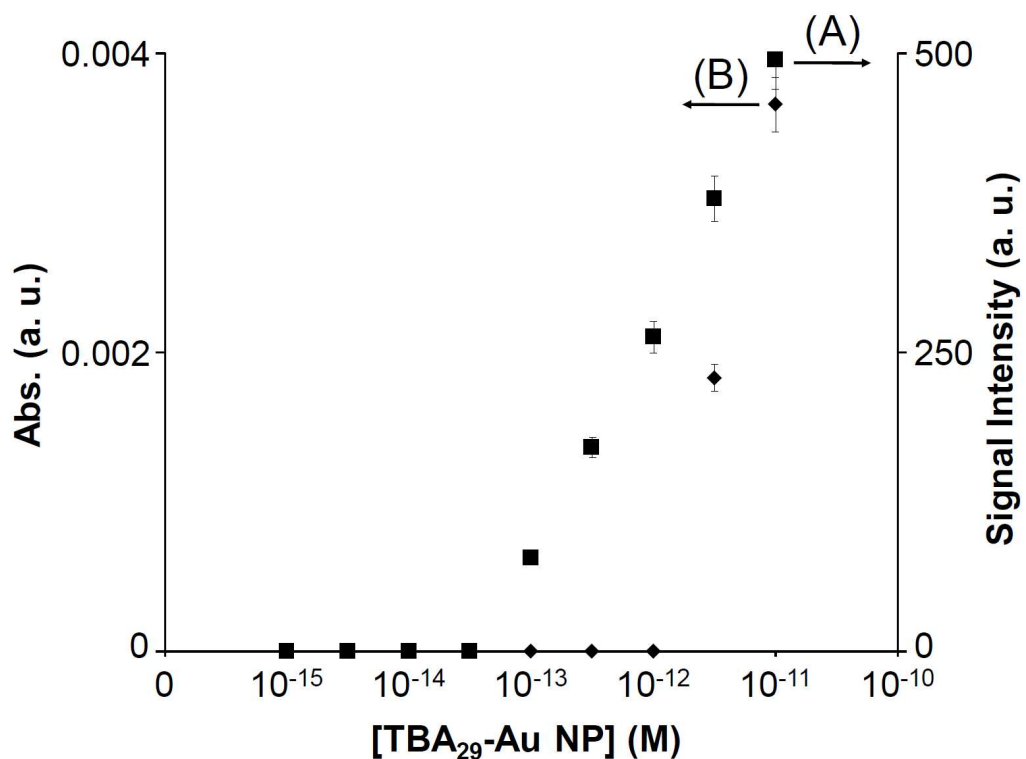

**Figure S4** (A) Signal intensities of  $[\text{Au}_1]^+$  ions recorded through LDI-MS from a TBA<sub>29</sub>-AuNP/NCM substrate after the NCM had been immersed in TBA<sub>29</sub>-AuNP solutions of various concentrations (1 fM–10 pM). (B) UV-Vis absorptions at 520 nm (SPR band) of TBA<sub>29</sub>-AuNPs at concentrations from 1 fM to 10 pM.

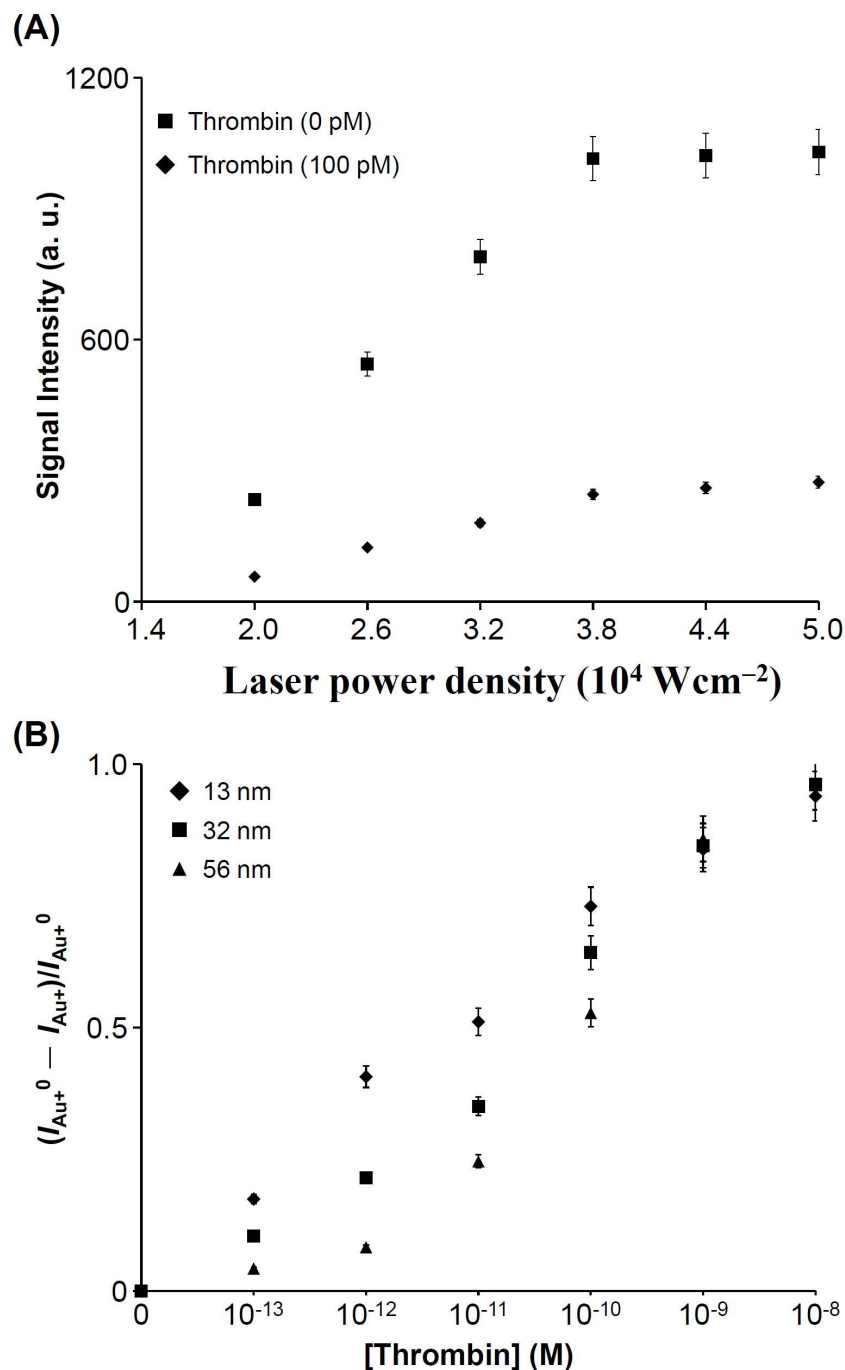

**Figure S5** Effects of (A) laser fluence and (B) particle size of TBA<sub>29</sub>-AuNPs on LDI-MS analysis of thrombin using the TBA<sub>29</sub>-AuNP/NCM substrate as the matrix. The descriptors  $I_{\text{Au}^+}^0$  and  $I_{\text{Au}^+}$  in (B) represent the intensities of the  $[\text{Au}]^+$  ions from TBA<sub>29</sub>-AuNP/NCM in the absence and presence of thrombin, respectively. Error bars represent standard deviations from five repeated experiments. Other conditions were the same as those described in Figure 1.

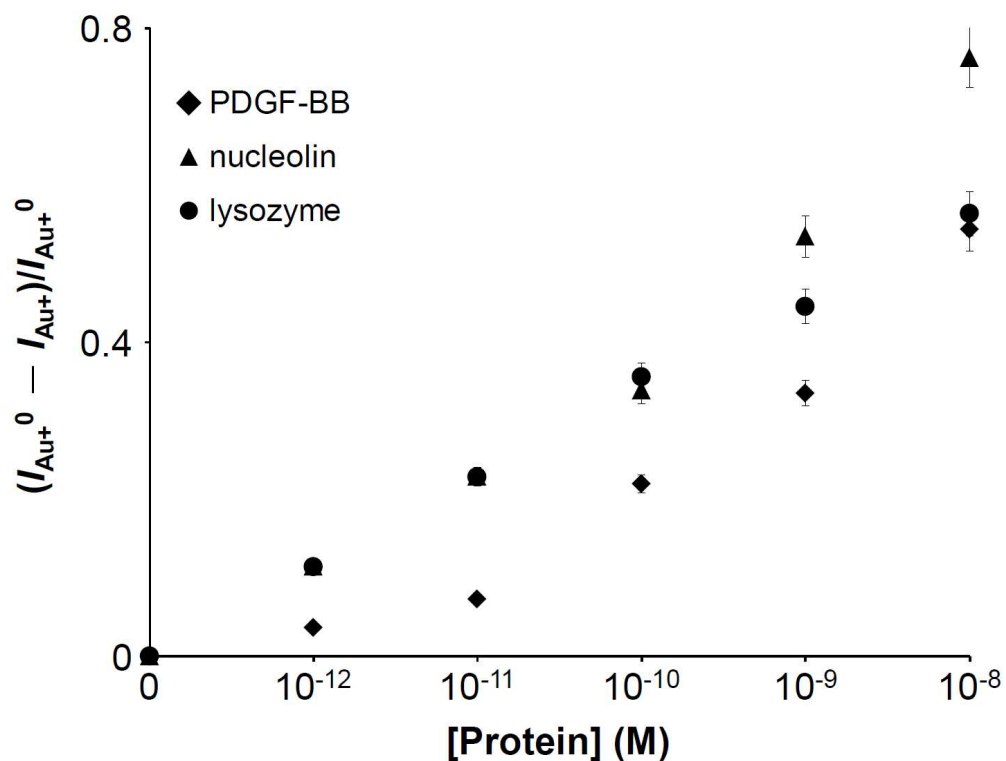

**Figure S6** Relative signal intensities of  $[Au_1]^+$  ions obtained from the Apt–AuNP/NCM probe in analytical solutions containing a biological buffer, BSA (100  $\mu$ M), and various concentrations of target proteins (0–10 nM). Other conditions were the same as those described in Figure 1.
